# Supplementary material
Source: publisher figshare collection journal article supplement (https://sage.figshare.com/ndownloader/files/14441465)
Supplement: Supplementary file 1 [file 14441465]

Supplemental Material for  
 Racial Bias in Perceptions of Size and Strength:  
 The Impact of Stereotypes and Group Differences

David J. Johnson<sup>1,2</sup> and John Paul Wilson<sup>3</sup>

<sup>1</sup>Michigan State University

<sup>2</sup>University of Maryland at College Park

<sup>3</sup>Montclair State University

**Table of Contents**

|                                                                                   |    |
|-----------------------------------------------------------------------------------|----|
| Descriptive Statistics for all Variables .....                                    | 2  |
| Correlations Between Variables (Study 1) .....                                    | 3  |
| Correlations Between Variables (Study 2) .....                                    | 4  |
| Rater Predictions for Study 2 .....                                               | 5  |
| Does Rater Sex or Race Moderate Judgments of Size and Strength?.....              | 6  |
| Does Race Increase or Decrease Accuracy in Perceptions of Size and Strength?..... | 11 |
| References .....                                                                  | 15 |

### Descriptive Statistics for all Variables

Table S1. Descriptive Statistics for all Variables

| Variable | Person  | Study 1    |         |            |         | Study 2    |         |            |         |
|----------|---------|------------|---------|------------|---------|------------|---------|------------|---------|
|          |         | Men        |         | Women      |         | Men        |         | Women      |         |
|          |         | M (SD)     | Range   |
| Height   | Target  | 71 (2.7)   | 60-81   | 66 (2.7)   | 53-73   | 70 (2.7)   | 60-78   | 66 (2.9)   | 57-73   |
| Upper B. | Target  | 40 (12.6)  | 0-78    | 20 (5.7)   | 2-38    | 39 (13.1)  | 11-78   | 19 (5.9)   | 5-34    |
| Bicep    | Target  | 346 (38.0) | 200-490 | 291 (35.1) | 190-480 | 347 (39.2) | 270-460 | 293 (43.2) | 190-480 |
| Asian    | Target  | 44         |         | 58         |         | 36         |         | 56         |         |
| Black    | Target  | 59         |         | 76         |         | 59         |         | 74         |         |
| White    | Target  | 567        |         | 741        |         | 64         |         | 65         |         |
| Sex      | Target  | 670        |         | 875        |         | 159        |         | 195        |         |
| Asian    | Rater   | 46         |         | 32         |         | 51         |         | 55         |         |
| Black    | Rater   | 37         |         | 52         |         | 33         |         | 56         |         |
| White    | Rater   | 416        |         | 449        |         | 53         |         | 55         |         |
| Sex      | Rater   | 499        |         | 533        |         | 137        |         | 166        |         |
| Strength | Rater   | 54 (20.1)  | 0-100   | 46 (20.0)  | 0-100   | 53 (21.2)  | 10-100  | 41 (22.0)  | 2-90    |
| Height   | Rater   | 70 (4.6)   | 8-94    | 65 (4.1)   | 17-87   | 70 (4.1)   | 56-85   | 63 (4.4)   | 49-74   |
| Strength | Outcome | 4 (1.5)    | 1-7     | 4 (1.3)    | 1-7     | 4 (1.5)    | 1-7     | 4 (1.3)    | 1-7     |
| Height   | Outcome | NA         | NA      | NA         | NA      | 4 (1.3)    | 1-7     | 4 (1.3)    | 1-7     |

*Note.* Upper B. refers to upper body strength in kg. Bicep refers to bicep circumference in cm.

### Correlations Between Variables (Study 1)

Table S2. Correlations Between Target Variables (Study 1)

| Variable                      | 1           | 2           | 3           | 4           | 5           | 6           |
|-------------------------------|-------------|-------------|-------------|-------------|-------------|-------------|
| 1. Target Height              | --          | <b>.16</b>  | <b>.15</b>  | <b>-.21</b> | -.07        | <b>.08</b>  |
| 2. Target Upper Body Strength | <b>.07</b>  | --          | <b>.33</b>  | -.06        | <b>-.11</b> | <b>.24</b>  |
| 3. Target Bicep Circumference | <b>.09</b>  | <b>.24</b>  | --          | <b>-.10</b> | <b>.13</b>  | <b>.35</b>  |
| 4. Target Race (Asian)        | <b>-.11</b> | <b>-.14</b> | <b>-.18</b> | --          | NA          | <b>-.12</b> |
| 5. Target Race (Black)        | .03         | -.06        | <b>.19</b>  | NA          | --          | <b>.16</b>  |
| 6. Rated Strength             | <b>.13</b>  | <b>.17</b>  | <b>.28</b>  | <b>-.18</b> | <b>.13</b>  | --          |

*Note.* Correlations for male targets are above the diagonal; correlations for female targets are below the diagonal.  $N_{\text{Male}} = 666$ ,  $N_{\text{Female}} = 872$ . Correlations with strength ratings control for nonindependence among raters and targets. Correlations with race are relative to Whites. Bolded correlations are significant at  $p < .05$ .

Table S3. Correlations Between Rater Variables (Study 1)

| Variable              | 1  | 2   | 3           | 4          | 5           | 6           |
|-----------------------|----|-----|-------------|------------|-------------|-------------|
| 1. Rater Sex (Male)   | -- | .06 | -.03        | <b>.18</b> | <b>.55</b>  | <b>-.08</b> |
| 2. Rater Race (Asian) |    | --  | <b>-.09</b> | -.03       | <b>-.11</b> | -.03        |
| 3. Rater Race (Black) |    |     | --          | -.02       | <b>-.06</b> | <b>-.04</b> |
| 4. Rater Strength     |    |     |             | --         | <b>.18</b>  | <b>-.08</b> |
| 5. Rater Height       |    |     |             |            | --          | <b>-.05</b> |
| 6. Strength Ratings   |    |     |             |            |             | --          |

*Note.*  $N = 1020$ . Correlations with strength ratings control for nonindependence among raters and targets. Bolded correlations are significant at  $p < .05$ .

### Correlations Between Variables (Study 2)

Table S4. Correlations Between Target Variables (Study 2)

| Variable                      | 1           | 2           | 3           | 4           | 5           | 6           | 7           |
|-------------------------------|-------------|-------------|-------------|-------------|-------------|-------------|-------------|
| 1. Target Height              | --          | .12         | .08         | <b>-.46</b> | -.15        | .03         | <b>.43</b>  |
| 2. Target Upper Body Strength | <b>.15</b>  | --          | <b>.27</b>  | -.11        | -.20        | <b>.21</b>  | .07         |
| 3. Target Bicep Circumference | .13         | <b>.38</b>  | --          | -.02        | <b>.30</b>  | <b>.40</b>  | <b>.13</b>  |
| 4. Target Race (Asian)        | <b>-.24</b> | <b>-.30</b> | <b>-.31</b> | --          | NA          | <b>-.20</b> | <b>-.33</b> |
| 5. Target Race (Black)        | .01         | -.13        | <b>.27</b>  | NA          | --          | <b>.25</b>  | .03         |
| 6. Rated Strength             | <b>.12</b>  | <b>.25</b>  | <b>.44</b>  | <b>-.31</b> | <b>.14</b>  | --          | <b>.23</b>  |
| 7. Height Ratings             | <b>.43</b>  | .07         | <b>.13</b>  | <b>-.27</b> | <b>-.02</b> | <b>.23</b>  | --          |

*Note.* Correlations for male targets are above the diagonal; correlations for female targets are below the diagonal.  $N_{\text{Male}} = 157$ ,  $N_{\text{Female}} = 195$ . Correlations with strength and height ratings control for nonindependence among raters and targets. Correlations with race are relative to Whites. Bolded correlations are significant at  $p < .05$ .

Table S5. Correlations Between Rater Variables (Study 2)

| Variable              | 1  | 2   | 3           | 4           | 5           | 6           | 7           |
|-----------------------|----|-----|-------------|-------------|-------------|-------------|-------------|
| 1. Rater Sex (Male)   | -- | .02 | -.10        | <b>.27</b>  | <b>.62</b>  | .00         | -.04        |
| 2. Rater Race (Asian) |    | --  | <b>-.46</b> | .03         | <b>-.12</b> | .01         | <b>.05</b>  |
| 3. Rater Race (Black) |    |     | --          | <b>-.13</b> | -.07        | <b>-.05</b> | <b>-.09</b> |
| 4. Rater Strength     |    |     |             | --          | <b>.34</b>  | .00         | .04         |
| 5. Rater Height       |    |     |             |             | --          | -.03        | <b>-.06</b> |
| 6. Strength Ratings   |    |     |             |             |             | --          | <b>.23</b>  |
| 7. Height Ratings     |    |     |             |             |             |             | --          |

*Note.*  $N = 303$ . Correlations with strength and height ratings control for nonindependence among raters and targets. Bolded correlations are significant at  $p < .05$ .

## Rater Predictions for Study 2

In addition to the focal pre-registered hypotheses about race in Study 2, we examined whether we could replicate some of the smaller biases in strength judgments due to individual differences in rater characteristics. Based on the data from Study 1, we also pre-registered the hypotheses that male raters, as well as raters who reported being stronger, would rate targets that were men as weaker (or shorter). We did not replicate these findings. There was no evidence that raters who were men rated targets as weaker ( $\beta = .042$ , 95% CI = [-.070, .154],  $p = .465$ ), nor did stronger raters rate targets as weaker ( $\beta = -.000$ , 95% CI = [-.047, .046],  $p = .970$ ). We also tested whether raters who were men and who reported themselves as stronger would rate men as shorter. Neither hypothesis was supported; in fact, stronger raters rated targets as *taller* ( $\beta = .057$ , 95% CI = [.005, .109],  $p = .031$ ).

Despite improving the internal validity of our research design in Study 2 by recruiting a more racially balanced sample of participants and targets, increasing the number of targets, and moving the task into the laboratory, we did not replicate the findings from Study 1 that rater characteristics impacted judgments of size or strength. This is perhaps somewhat unsurprising given that in both studies the variance explained by rater characteristics was quite small (1%) and outweighed considerably by the physical characteristics of the targets. Similarly, the intra-class correlations revealed that perceptions of size and strength are driven primarily by target characteristics rather than rater characteristics (see Table 2). This is consistent with work showing that appearance-based appraisals are less driven by perceiver characteristics (Hehman, Sutherland, Flake, & Slepian, 2017).

### **Does Rater Sex or Race Moderate Judgments of Size and Strength?**

As an exploratory analysis we tested whether racial bias in judgments of size and strength depended on rater characteristics. Specifically, we tested whether these biases were moderated by rater sex, race, and their interactions. We estimated the models specified in the main text but added additional coefficient terms that allowed racial bias to vary by participant sex (participant sex and target race interaction), participant race (participant race and target race interaction), and participant race and sex (three-way interaction). Because these analyses were exploratory, we only discuss results that were significant at an alpha level of .05 *and* had an effect size of greater than .2 (in standardized regression units). This approach is sensible given that the degrees of freedom are inflated for these models. This is because our analyses only model variation by participant and target (i.e., in the intercepts) and not variation in the fixed effects (i.e., random slopes). While more complex models would better account for this variability, our goal was not to test whether the effects of race or sex vary by participant or target and so we did not include random effects in the model.

The coefficients for these exploratory models can be seen in Tables S6 – S9. Tables S6 and S7 detail the results from Study 1, while Tables S8 and S9 detail the results from Study 2. When using the aforementioned thresholds, racial biases varied based on rater characteristics in only two cases. Racial bias in strength judgments for Asian men was weaker for Asian raters, regardless of sex (see Table S6). Racial bias in height judgments for Asian men was also weaker for raters who were men, regardless of their race (see Table S8). Furthermore, including these interactions resulted in a negligible increase in variance explained; in no model did the variance explained increase by more than .02%. Thus, we saw little evidence that rater characteristics moderated the effects of racial biases on perceptions of size and strength.

Table S6. Study 1 Multilevel Regression Summary Table for Male Targets

| Variable                   | $\beta$ | <i>df</i> | <i>SE</i> | <i>p</i> |
|----------------------------|---------|-----------|-----------|----------|
| Target Height              | -0.004  | 644       | 0.021     | .837     |
| Target Upper Body Strength | 0.157   | 644       | 0.021     | < .001   |
| Target Bicep Circumference | 0.276   | 667       | 0.022     | < .001   |
| Target Race (Asian)        | 0.326   | 680       | 0.083     | < .001   |
| Target Race (Black)        | 0.500   | 679       | 0.072     | < .001   |
| Rater Sex (Male)           | -0.148  | 1022      | 0.037     | < .001   |
| Rater Race (Asian)         | -0.123  | 1046      | 0.057     | .031     |
| Rater Race (Black)         | -0.145  | 1023      | 0.054     | .007     |
| Rater Strength             | -0.070  | 997       | 0.015     | < .001   |
| Rater Height               | 0.001   | 971       | 0.018     | .943     |
| TA $\times$ RM             | 0.107   | 15909     | 0.046     | .020     |
| TB $\times$ RM             | 0.015   | 15902     | 0.041     | .710     |
| TA $\times$ RA             | 0.207   | 15850     | 0.083     | .013     |
| TB $\times$ RA             | -0.096  | 15884     | 0.078     | .215     |
| TA $\times$ RB             | 0.018   | 15842     | 0.075     | .815     |
| TB $\times$ RB             | 0.011   | 15904     | 0.065     | .861     |
| RM $\times$ RA             | 0.500   | 1042      | 0.112     | .407     |
| RM $\times$ RB             | -0.148  | 1016      | 0.107     | .552     |
| TA $\times$ RM $\times$ RA | -0.147  | 15833     | 0.166     | .376     |
| TB $\times$ RM $\times$ RA | 0.128   | 15894     | 0.155     | .411     |
| TA $\times$ RM $\times$ RB | 0.249   | 15843     | 0.150     | .097     |
| TB $\times$ RM $\times$ RB | -0.034  | 15888     | 0.130     | .796     |

*Note.* Race was dummy coded with Whites as the reference group. T = Target, R = Rater, A = Asian, B = Black, M = Male

Table S7. Study 1 Multilevel Regression Summary Table for Female Targets

| Variable                   | $\beta$ | <i>df</i> | <i>SE</i> | <i>p</i> |
|----------------------------|---------|-----------|-----------|----------|
| Target Height              | 0.088   | 873       | 0.013     | < .001   |
| Target Upper Body Strength | 0.098   | 870       | 0.013     | < .001   |
| Target Bicep Circumference | 0.211   | 864       | 0.013     | < .001   |
| Target Race (Asian)        | -0.522  | 935       | 0.053     | < .001   |
| Target Race (Black)        | 0.339   | 912       | 0.047     | < .001   |
| Rater Sex (Male)           | -0.146  | 896       | 0.043     | .001     |
| Rater Race (Asian)         | -0.002  | 925       | 0.064     | .973     |
| Rater Race (Black)         | -0.053  | 912       | 0.066     | .425     |
| Rater Strength             | -0.022  | 881       | 0.017     | .194     |
| Rater Height               | -0.021  | 868       | 0.021     | .326     |
| TA $\times$ RM             | -0.055  | 19900     | 0.047     | .240     |
| TB $\times$ RM             | 0.095   | 19784     | 0.040     | .018     |
| TA $\times$ RA             | 0.197   | 19925     | 0.086     | .023     |
| TB $\times$ RA             | -0.094  | 19896     | 0.072     | .191     |
| TA $\times$ RB             | 0.113   | 19775     | 0.090     | .208     |
| TB $\times$ RB             | 0.047   | 19890     | 0.078     | .547     |
| RM $\times$ RA             | 0.117   | 922       | 0.125     | .350     |
| RM $\times$ RB             | 0.000   | 913       | 0.133     | .997     |
| TA $\times$ RM $\times$ RA | 0.036   | 19922     | 0.173     | .835     |
| TB $\times$ RM $\times$ RA | -0.131  | 19820     | 0.143     | .361     |
| TA $\times$ RM $\times$ RB | 0.200   | 19828     | 0.181     | .269     |
| TB $\times$ RM $\times$ RB | -0.060  | 19908     | 0.156     | .699     |

*Note.* Race was dummy coded with Whites as the reference group. T = Target, R = Rater, A = Asian, B = Black, M = Male



Table S8. Study 2 Multilevel Regression Summary Table for Male Targets

| Variable                   | Strength |           |           |          | Height  |           |           |          |
|----------------------------|----------|-----------|-----------|----------|---------|-----------|-----------|----------|
|                            | $\beta$  | <i>df</i> | <i>SE</i> | <i>p</i> | $\beta$ | <i>df</i> | <i>SE</i> | <i>p</i> |
| Target Height              | -0.079   | 156       | 0.044     | .076     | 0.382   | 156       | 0.033     | < .001   |
| Target Upper Body Strength | 0.165    | 156       | 0.044     | < .001   | 0.015   | 156       | 0.033     | .651     |
| Target Bicep Circumference | 0.290    | 156       | 0.046     | < .001   | 0.055   | 156       | 0.034     | .104     |
| Target Race (Asian)        | -0.488   | 165       | 0.118     | < .001   | -0.322  | 176       | 0.088     | < .001   |
| Target Race (Black)        | 0.364    | 165       | 0.102     | < .001   | 0.127   | 175       | 0.077     | .100     |
| Rater Sex (Male)           | 0.035    | 327       | 0.084     | .676     | -0.101  | 327       | 0.094     | .281     |
| Rater Race (Asian)         | -0.060   | 337       | 0.057     | .286     | 0.014   | 338       | 0.063     | .821     |
| Rater Race (Black)         | -0.168   | 337       | 0.058     | .004     | -0.173  | 338       | 0.065     | .008     |
| Rater Strength             | -0.001   | 286       | 0.024     | .963     | 0.057   | 286       | 0.026     | .032     |
| Rater Height               | -0.048   | 286       | 0.029     | .104     | -0.076  | 286       | 0.033     | .021     |
| TA $\times$ RM             | 0.133    | 12325     | 0.048     | .005     | 0.210   | 12329     | 0.053     | < .001   |
| TB $\times$ RM             | 0.017    | 12327     | 0.041     | .684     | 0.033   | 12331     | 0.046     | .473     |
| TA $\times$ RA             | 0.167    | 12330     | 0.035     | < .001   | 0.071   | 12335     | 0.039     | .070     |
| TB $\times$ RA             | -0.049   | 12328     | 0.030     | .099     | 0.001   | 12331     | 0.034     | .971     |
| TA $\times$ RB             | 0.069    | 12325     | 0.036     | .057     | 0.004   | 12329     | 0.040     | .916     |
| TB $\times$ RB             | 0.014    | 12325     | 0.031     | .649     | -0.035  | 12327     | 0.035     | .315     |
| RM $\times$ RA             | 0.007    | 340       | 0.111     | .951     | 0.046   | 341       | 0.124     | .709     |
| RM $\times$ RB             | -0.069   | 338       | 0.115     | .550     | -0.014  | 339       | 0.128     | .914     |
| TA $\times$ RM $\times$ RA | -0.153   | 12329     | 0.070     | .028     | -0.092  | 12334     | 0.078     | .238     |
| TB $\times$ RM $\times$ RA | -0.014   | 12329     | 0.060     | .821     | 0.070   | 12333     | 0.067     | .295     |
| TA $\times$ RM $\times$ RB | -0.074   | 12326     | 0.072     | .303     | -0.062  | 12329     | 0.081     | .444     |
| TB $\times$ RM $\times$ RB | 0.067    | 12325     | 0.062     | .283     | -0.028  | 12328     | 0.070     | .689     |

*Note.* Race was dummy coded with Whites as the reference group. T = Target, R = Rater, A = Asian, B = Black, M = Male

Table S9. Study 2 Multilevel Regression Summary Table for Female Targets

| Variable                   | Strength |           |           |          | Height  |           |           |          |
|----------------------------|----------|-----------|-----------|----------|---------|-----------|-----------|----------|
|                            | $\beta$  | <i>df</i> | <i>SE</i> | <i>p</i> | $\beta$ | <i>df</i> | <i>SE</i> | <i>p</i> |
| Target Height              | 0.021    | 194       | 0.027     | .441     | 0.425   | 194       | 0.033     | < .001   |
| Target Upper Body Strength | 0.085    | 194       | 0.029     | .004     | 0.018   | 195       | 0.036     | .618     |
| Target Bicep Circumference | 0.321    | 194       | 0.031     | < .001   | 0.058   | 195       | 0.038     | .128     |
| Target Race (Asian)        | -0.448   | 228       | 0.072     | < .001   | -0.339  | 214       | 0.087     | < .001   |
| Target Race (Black)        | 0.112    | 227       | 0.067     | .098     | -0.039  | 214       | 0.082     | .630     |
| Rater Sex (Male)           | -0.070   | 359       | 0.085     | .411     | -0.140  | 361       | 0.080     | .080     |
| Rater Race (Asian)         | 0.114    | 374       | 0.057     | .046     | 0.106   | 377       | 0.054     | .048     |
| Rater Race (Black)         | -0.069   | 378       | 0.059     | .238     | -0.105  | 380       | 0.055     | .058     |
| Rater Strength             | 0.031    | 286       | 0.023     | .187     | 0.077   | 286       | 0.022     | < .001   |
| Rater Height               | -0.064   | 286       | 0.029     | .027     | -0.058  | 286       | 0.027     | .033     |
| TA $\times$ RM             | 0.102    | 14618     | 0.050     | .042     | 0.102   | 14614     | 0.048     | .032     |
| TB $\times$ RM             | 0.048    | 14630     | 0.046     | .296     | -0.017  | 14626     | 0.044     | .699     |
| TA $\times$ RA             | 0.055    | 14616     | 0.036     | .132     | 0.039   | 14612     | 0.035     | .264     |
| TB $\times$ RA             | -0.040   | 14624     | 0.034     | .233     | -0.060  | 14619     | 0.032     | .064     |
| TA $\times$ RB             | 0.152    | 14617     | 0.038     | < .001   | 0.058   | 14613     | 0.036     | .108     |
| TB $\times$ RB             | 0.056    | 14622     | 0.035     | .109     | -0.044  | 14619     | 0.033     | .193     |
| RM $\times$ RA             | -0.002   | 378       | 0.112     | .986     | -0.037  | 381       | 0.105     | .727     |
| RM $\times$ RB             | -0.077   | 379       | 0.116     | .508     | -0.081  | 382       | 0.109     | .461     |
| TA $\times$ RM $\times$ RA | -0.010   | 14615     | 0.073     | .894     | 0.051   | 14611     | 0.069     | .458     |
| TB $\times$ RM $\times$ RA | 0.049    | 14623     | 0.068     | .469     | 0.083   | 14618     | 0.065     | .199     |
| TA $\times$ RM $\times$ RB | -0.095   | 14617     | 0.075     | .206     | -0.072  | 14613     | 0.072     | .319     |
| TB $\times$ RM $\times$ RB | -0.052   | 14625     | 0.070     | .464     | 0.127   | 14621     | 0.067     | .057     |

*Note.* Race was dummy coded with Whites as the reference group. T = Target, R = Rater, A = Asian, B = Black, M = Male

### Does Race Increase or Decrease Accuracy in Perceptions of Size and Strength?

Judgments of size and strength were both predicted by race and physical information. However, just because race impacts judgments when controlling for physical features does not mean it decreases accuracy. Rather, when individuating information is difficult to parse, relying on valid information about group differences may increase accuracy. We tested this in an exploratory analysis by comparing the correlation between target race and *actual* physical features to the correlation between target race and *perceptions* of physical features. When the correlation between race and perceptions is larger (smaller) than the correlation between race and actual differences, individuals' overestimate (underestimate) real group differences.

We used the conceptual model outlined in Madon et al. (1998; see also Jussim, 1991) to estimate the correlation between race and perceived physical features (Figure S1). This model states that individuating information (Path A) and stereotypes (Path B) independently impact perceptions of size and strength. Using path tracing rules, the correlation between race and *actual* size or strength ( $r_{RA}$ ) can be decomposed as:  $r_{RA} = \text{Path B} + r_{RP}$  (Path A), where  $r_{RP}$  is the correlation between target race and *perceived* size or strength.

This decomposition makes it possible to compare the correlation between race and perceived physical features with and without the effect of race stereotypes (i.e., setting Path B to 0). If the predicted correlation between race and perceived size or strength ( $r_{RP}$ ) is closer to the actual correlation between race and size or strength ( $r_{RA}$ ) when the effect of stereotypes is set to zero race stereotypes *decrease* accuracy. However, if the predicted correlation between race and perceived size or strength ( $r_{RP}$ ) is farther from the actual correlation between race and size or strength ( $r_{RA}$ ) when the effect of stereotypes is set to zero race stereotypes *increase* accuracy.

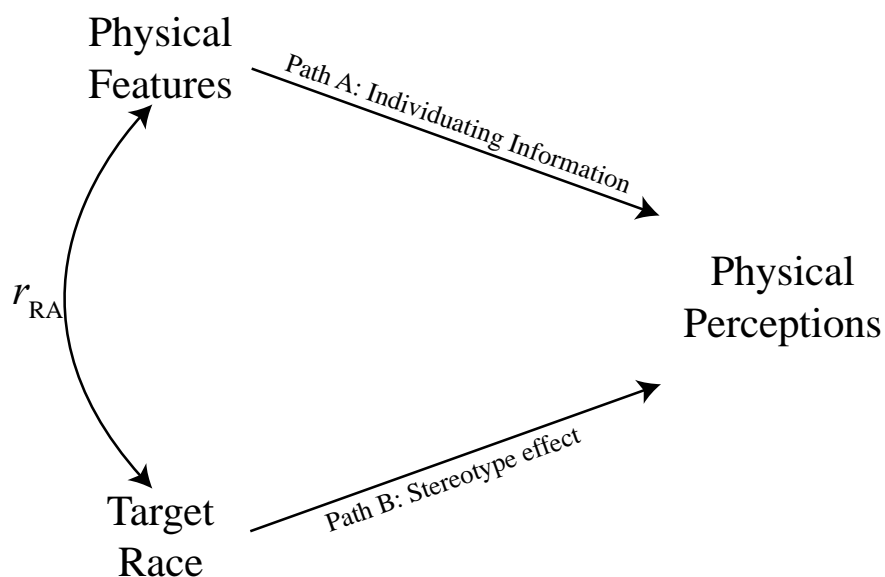

Figure S1. Conceptual model relating targets' physical features and race to raters' perceptions of strength and size.  $r_{RA}$  refers to the correlation between target race and *actual* size or strength.  $r_{RP}$  (not photographed) refers to the correlation between target race and *perceived* size or strength.

We estimated this model by regressing perceptions of physical features on individuating information and target race within a multilevel regression controlling for targets and raters. We estimated different models comparing each race and sex category to the White target category (e.g., Asian men to White men). All predictors were standardized. Results are reported in Table S10, alongside the predicted correlation between race and perceived strength, calculated two ways.  $r_{RP}$  reflects the correlation between race and perceived strength given the effect of stereotypes observed in the sample.<sup>1</sup>  $r_{RP0}$  reflects a correlation assuming raters do *not* use group membership (i.e., the stereotype effect is 0). These correlations are compared to the correlation between race and physical features ( $r_{RA}$ ) based on nationally representative data from the NHNES ( $N = 11,196$  adults). We chose to compare the correlations between race and perceived strength to this value over the sample value for two reasons. First, raters only saw a small subset

<sup>1</sup> These expected correlations differ somewhat from the observed correlations between race and physical perceptions (see the Supplemental Materials). Larger discrepancies between predicted and observed correlations indicate poorer model fit in a structural equation modeling framework.

of the targets in both studies, so the sample correlation between race and physical features differed for each rater. More importantly, we assumed raters' stereotypes would mirror real world experiences (rather than implicit knowledge of our sample's characteristics). Such experiences are better captured by representative data than the nonrepresentative sample in our study.

Table S10. Correlations between Race and Physical Features or Physical Perceptions (Study 2)

| Sex    | Race  | Strength |       |          |          |           | Height |        |          |          |           |
|--------|-------|----------|-------|----------|----------|-----------|--------|--------|----------|----------|-----------|
|        |       | Race     | Bicep | $r_{RP}$ | $r_{RA}$ | $r_{RP0}$ | Race   | Height | $r_{RP}$ | $r_{RA}$ | $r_{RP0}$ |
| Male   | Asian | -.18     | .38   | -.28     | -.28     | -.10      | -.13   | .43    | -.29     | -.36     | -.15      |
| Male   | Black | .14      | .35   | .18      | .10      | .04       | .08    | .38    | .07      | -.03     | -.01      |
| Female | Asian | -.18     | .41   | -.30     | -.29     | -.12      | -.16   | .43    | -.31     | -.34     | -.14      |
| Female | Black | .05      | .32   | .12      | .20      | .06       | -.03   | .45    | -.01     | .03      | .01       |

*Note.* White is the reference category for all race effects. Race, Bicep, and Height reflect the standardized independent contribution of these variables to ratings of strength or height.  $r_{RP}$  = predicted correlation between race and perceived strength.  $r_{RA}$  = actual correlation between race and bicep circumference or height based on data on all adults over 19 from the NHNES (2011 – 2016).  $r_{RP0}$  = predicted correlation between race and perceived strength *if a person did not use race stereotypes*. If stereotypes aid accuracy  $r_{RP}$  should be closer to  $r_{RA}$  than  $r_{RP0}$ .

Consistent with the main results, both race and individuating information independently predicted perceptions of strength and size. Overall, predicted correlations between race and perceived physical features ( $r_{RP}$ ) were remarkably close to the correlations from national data ( $r_{RA}$ ), indicating raters' judgments of the relationship between race and physical features were accurate at the group-level. In addition, perceptions of strength and height were *less* accurate when the effect of stereotypes was removed for every group except Black men. For Black men, stereotypes caused people to overestimate the relationship between race and strength ( $r_{RP} = .18$ ) relative to the actual correlation from nationally representative data ( $r_{RA} = .10$ ). The same pattern occurred for the relationship between race and height ( $r_{RP} = .07$  vs.  $r_{RA} = -.03$ ).

In sum, for all groups other than Black men, relying on valid information about group

differences improved participants' accuracy when making judgments of size and strength. The reason these group stereotypes improve accuracy is because raters' judgments only moderately reflected individuating information ( $.30 < \beta_s < .45$ ). It is likely the photographs did not provide the perfect information needed to make accurate judgments of size and strength. If such information were perfectly clear any remaining stereotype effect would decrease accuracy rather than increase it.

## References

- Hehman, E., Sutherland, C. A. M., Flake, J. K., & Slepian, M. L. (2017). The unique contributions of perceiver and target characteristics in person perception. *Journal of Personality and Social Psychology, 113*, 513–529.
- Jussim, L. (1991). Social perception and social reality: A reflection-construction model. *Psychological Review, 98*, 54-73.
- Madon, S., Jussim, L., Keiper, S., Eccles, J., Smith, A., & Palumbo, P. The accuracy and power of sex, social class, and ethnic stereotypes: A naturalistic study in person perception. *Personality and Social Psychology Bulletin, 24*, 1304-1318.
